# Supplementary material
Source: PubMed Central journal article supplement (PMC6322043)
Supplement: AnnalsATS.201801-004OC_schwab_data_supplement.pdf [file AnnalsATS.201801-004OC_schwab_data_supplement.pdf]

# **Actigraphy to Evaluate Sleep in the Intensive Care Unit: A Systematic Review**

Kristin E. Schwab, MD  
Bonnie Ronish, MD  
Dale M. Needham, MD, PhD  
An Q. To, MS  
Jennifer L. Martin, PhD  
Biren B. Kamdar, MD, MBA, MHS

**ONLINE DATA SUPPLEMENT**

## Search Strategy

| Database | Search Terms                                                                                                                                                                                                                                                                                                                                                                                                                                                                                                                                                                                                                                                                                                                                                                                                                                                                                                                                                                                                                                                                                                                                                                                                                                                                                                                                                                                                                                                                                                                                                                                                                                                                                                                                                                                                                                                                                                                                                                                                                                                                                                                                                                                                                                                                                                                                                                                                                                                                                                                                                                                                                                                                                                                                                                                                                                | Results |
|----------|---------------------------------------------------------------------------------------------------------------------------------------------------------------------------------------------------------------------------------------------------------------------------------------------------------------------------------------------------------------------------------------------------------------------------------------------------------------------------------------------------------------------------------------------------------------------------------------------------------------------------------------------------------------------------------------------------------------------------------------------------------------------------------------------------------------------------------------------------------------------------------------------------------------------------------------------------------------------------------------------------------------------------------------------------------------------------------------------------------------------------------------------------------------------------------------------------------------------------------------------------------------------------------------------------------------------------------------------------------------------------------------------------------------------------------------------------------------------------------------------------------------------------------------------------------------------------------------------------------------------------------------------------------------------------------------------------------------------------------------------------------------------------------------------------------------------------------------------------------------------------------------------------------------------------------------------------------------------------------------------------------------------------------------------------------------------------------------------------------------------------------------------------------------------------------------------------------------------------------------------------------------------------------------------------------------------------------------------------------------------------------------------------------------------------------------------------------------------------------------------------------------------------------------------------------------------------------------------------------------------------------------------------------------------------------------------------------------------------------------------------------------------------------------------------------------------------------------------|---------|
| PubMed   | <p>("acute care"[tw] OR "acute disease"[MeSH] OR "anesthesia department, hospital"[MeSH] OR "anesthesia recovery period"[MeSH] OR "anesthesia"[MeSH:noexp] OR "anesthetic recovery"[tw] OR "assisted circulation"[tw] OR "burns"[MeSH] OR cardiac surgical procedure*[tw] OR "cardiopulmonary bypass"[tw] OR cardiovascular surgical procedure*[tw] OR "controlled respiration"[tw] OR "controlled ventilation"[tw] OR "craniectomies"[tw] OR "craniectomy"[tw] OR "critical care"[MeSH] OR "critical care"[tw] OR "critical illness"[MeSH] OR "critical illness"[tw] OR "critically ill"[tw] OR "ecmo"[tw] OR "extracorporeal circulation"[tw] OR "extracorporeal membrane oxygenation"[tw] OR "general surgery"[MeSH] OR heart-assist device*[tw] OR "intensive care units"[MeSH] OR "intensive care"[tw] OR neurosurgical procedure*[tw] OR organ transplant*[tw] OR "postoperative care"[MeSH] OR "postoperative period"[MeSH] OR "pulmonary surgical procedure"[tw] OR "recovery room"[MeSH] OR "respiration, artificial"[MeSH] OR "respiratory weaning"[tw] OR "specialties, surgical"[MeSH:noexp] OR "surgery"[subheading] OR "surgical decompression"[tw] OR "surgical procedures, operative"[MeSH] OR "surgical"[tw] OR thoracic surgical procedure*[tw] OR vascular surgical procedure*[tw] OR "ventilator weaning"[tw] OR acute condition*[tw] OR acute disease*[tw] OR acute disorder*[tw] OR anaesthes*[tw] OR anaesthesia* [tw] OR anesthes*[tw] OR anaesthesia* [tw] OR artificial respiration*[tw] OR artificial ventilation*[tw] OR burn*[tw] OR coronary care unit*[tw] OR esophagectom*[tw] OR hepatectom*[tw] OR icu*[tw] OR mechanical ventilation*[tw] OR pancreatectom*[tw] OR pancreaticoduodenectom*[tw] OR pancreaticojejunostom*[tw] OR postoperative*[tw] OR postsurger*[tw] OR recovery room*[tw] OR respiratory therap*[tw] OR sternotom*[tw] OR surger*[tw] OR thoracotom*[tw] OR ventilat*[tw]) AND ("actigraphy"[MeSH] OR "accelerometry"[MeSH] OR acceleromet*[tw] OR actimet*[tw] OR actig*[tw] OR actomet*[tw])</p>                                                                                                                                                                                                                                                                                                                                                                                                                                                                                                                                                                                                                                                                                                                                                                                     | 912     |
| Embase   | <p>('acute care':ti,ab,de or 'acute condition':ti,ab,de or 'acute conditions':ti,ab,de or 'acute disease':ti,ab,de or 'acute diseased':ti,ab,de or 'acute diseases':ti,ab,de or 'acute disorder':ti,ab,de or 'acute disorders':ti,ab,de or anaesthes*:ti,ab,de or anesthes*:ti,ab,de or 'anesthesia'/de or 'anesthetic recovery'/exp or 'artificial respiration':ti,ab,de or 'artificial respirations':ti,ab,de or 'artificial ventilation'/exp or 'artificial ventilation':ti,ab,de or 'artificial ventilations':ti,ab,de or 'assisted circulation':ti,ab,de or burn*:ti,ab,de or 'burn'/exp or 'cardiac surgical procedure':ti,ab,de or 'cardiac surgical procedures':ti,ab,de or 'cardiopulmonary bypass':ti,ab,de or 'cardiovascular surgical procedure':ti,ab,de or 'cardiovascular surgical procedures':ti,ab,de or 'controlled respiration':ti,ab,de or 'controlled ventilation':ti,ab,de or 'coronary care unit':ti,ab,de or 'coronary care units':ti,ab,de or 'craniectomies':ti,ab,de or 'craniectomy':ti,ab,de or 'critical care':ti,ab,de or 'critical illness'/exp or 'critical illness':ti,ab,de or 'critically ill':ti,ab,de or 'ecmo':ti,ab,de or esophagectom*:ti,ab,de or 'extracorporeal circulation':ti,ab,de or 'extracorporeal membrane oxygenation':ti,ab,de or 'general surgery'/exp or 'heart-assist device':ti,ab,de or 'heart-assist devices':ti,ab,de or hepatectom*:ti,ab,de or icu*:ti,ab,de or 'intensive care unit'/exp or 'intensive care':ti,ab,de or 'mechanical ventilation':ti,ab,de or 'mechanical ventilations':ti,ab,de or 'neurosurgical procedure':ti,ab,de or 'neurosurgical procedures':ti,ab,de or 'organ transplant':ti,ab,de or 'organ transplantation':ti,ab,de or 'organ transplantations':ti,ab,de or 'organ transplants':ti,ab,de or pancreatectom*:ti,ab,de or pancreaticoduodenectom*:ti,ab,de or pancreaticojejunostom*:ti,ab,de or 'postoperative care'/exp or 'postoperative period'/exp or postoperative*:ti,ab,de or postsurger*:ti,ab,de or 'pulmonary surgical procedure':ti,ab,de or 'recovery room'/exp or 'recovery room':ti,ab,de or 'recovery rooms':ti,ab,de or 'respiratory therapeutic':ti,ab,de or 'respiratory therapeutics':ti,ab,de or 'respiratory therapies':ti,ab,de or 'respiratory therapy':ti,ab,de or 'respiratory weaning':ti,ab,de or sternotom*:ti,ab,de or surger*:ti,ab,de or 'surgery'/de or 'surgical decompression':ti,ab,de or 'surgical':ti,ab,de or 'thoracic surgical procedure':ti,ab,de or 'thoracic surgical procedures':ti,ab,de or thoracotom*:ti,ab,de or 'vascular surgical procedure':ti,ab,de or 'vascular surgical procedures':ti,ab,de or ventilat*:ti,ab,de or 'ventilator weaning':ti,ab,de) and ('actimetry'/exp or 'accelerometry'/exp or acceleromet*:ti,ab,de or actimet*:ti,ab,de or actig*:ti,ab,de or actomet*:ti,ab,de)</p> | 1,483   |
| CINAHL   | <p>(MH("acute care" OR "acute disease" OR "anesthesia" OR "anesthesia recovery" OR "Respiration, Artificial+" OR "burns+" OR "burn units" OR "critical care+" OR "critical illness" OR "intensive care units+" OR "surgery, operative+" OR "specialties, surgical" OR "postoperative period" OR "postoperative care+") OR (TX("acute care" OR "acute condition" OR "acute conditions" OR "acute disease" OR "acute diseases" OR "acute diseased" OR "acute disorder" OR "acute disorders" OR anesthes* OR anaesthes* OR "anesthetic recovery" OR "artificial</p>                                                                                                                                                                                                                                                                                                                                                                                                                                                                                                                                                                                                                                                                                                                                                                                                                                                                                                                                                                                                                                                                                                                                                                                                                                                                                                                                                                                                                                                                                                                                                                                                                                                                                                                                                                                                                                                                                                                                                                                                                                                                                                                                                                                                                                                                            | 2,192   |

respiration" OR "artificial respirations" OR "artificial ventilation" OR "artificial ventilations" OR "assisted circulation" OR burn\* OR "cardiac surgical procedure" OR "cardiac surgical procedures" OR "cardiopulmonary bypass" OR "cardiovascular surgical procedure" OR "cardiovascular surgical procedures" OR "controlled respiration" OR "controlled ventilation" OR "coronary care unit" OR "coronary care units" OR craniectomy OR craniectomies OR "critical care" OR "critical illness" OR "critically ill" OR ecmo OR esophagectom\* OR "extracorporeal circulation" OR "extracorporeal membrane oxygenation" OR "heart-assist device" OR "heart-assist devices" OR hepatectom\* OR ICU\* OR "intensive care" OR "mechanical ventilation" OR "mechanical ventilations" OR "neurosurgical procedure" OR "neurosurgical procedures" OR "organ transplant" OR "organ transplantation" OR "organ transplantations" OR "organ transplants" OR pancreatectom\* OR pancreaticoduodenectom\* OR pancreaticojejunostom\* OR postoperative\* OR postsurger\* OR "pulmonary surgical procedure" OR "pulmonary surgical procedures" OR "recovery room" OR "recovery rooms" OR "respiratory therapy" OR "respiratory therapies" OR "respiratory therapeutic" OR "respiratory therapeutics" OR "respiratory weaning" OR sternotom\* OR surgical OR surger\* OR "surgical decompression" OR "thoracic surgical procedure" OR "thoracic surgical procedures" OR thoracotom\* OR "vascular surgical procedure" OR "vascular surgical procedures" OR ventilat\* OR "ventilator weaning")) AND ((MH "accelerometry+") OR (TX(acceleromet\* OR actimet\* OR actig\* OR actomet\*)))

Cochrane

- #1 "acute care":ti,ab,kw
- #2 "acute condition\*":ti,ab,kw
- #3 "acute disease\*":ti,ab,kw
- #4 MeSH descriptor: [Acute Disease] explode all trees
- #5 "acute disorder\*":ti,ab,kw
- #6 anaesthes\*:ti,ab,kw
- #7 anesthes\*:ti,ab,kw
- #8 MeSH descriptor: [Anesthesia Recovery Period] explode all trees
- #9 MeSH descriptor: [Anesthesia] this term only
- #10 "artificial respiration\*":ti,ab,kw
- #11 MeSH descriptor: [Respiration, Artificial] explode all trees
- #12 "artificial ventilation\*":ti,ab,kw
- #13 "assisted circulation":ti,ab,kw
- #14 burn\*:ti,ab,kw
- #15 MeSH descriptor: [Burns] explode all trees
- #16 "cardiac surgical procedure\*":ti,ab,kw
- #17 "cardiopulmonary bypass":ti,ab,kw
- #18 "cardiovascular surgical procedure\*":ti,ab,kw
- #19 "controlled respiration":ti,ab,kw
- #20 "controlled ventilation":ti,ab,kw
- #21 "coronary care unit\*":ti,ab,kw
- #22 craniectomy:ti,ab,kw
- #23 MeSH descriptor: [Critical Care] explode all trees
- #24 "critical care":ti,ab,kw
- #25 MeSH descriptor: [Critical Illness] explode all trees
- #26 "critical illness":ti,ab,kw
- #27 "critically ill":ti,ab,kw
- #28 ecmo:ti,ab,kw
- #29 esophagectom\*:ti,ab,kw
- #30 "extracorporeal circulation":ti,ab,kw
- #31 "extracorporeal membrane oxygenation":ti,ab,kw
- #32 MeSH descriptor: [General Surgery]
- #33 "heart-assist device\*":ti,ab,kw
- #34 hepatectom\*:ti,ab,kw
- #35 icu\*:ti,ab,kw
- #36 MeSH descriptor: [Intensive Care Units] explode all trees
- #37 "intensive care":ti,ab,kw
- #38 "mechanical ventilation\*":ti,ab,kw
- #39 "neurosurgical procedure\*":ti,ab,kw
- #40 "organ transplant\*":ti,ab,kw
- #41 pancreatectom\*:ti,ab,kw
- #42 pancreaticoduodenectom\*:ti,ab,kw
- #43 pancreaticojejunostom\*:ti,ab,kw
- #44 MeSH descriptor: [Postoperative Care] explode all trees

202

- 
- #45 MeSH descriptor: [Postoperative Period] explode all trees
  - #46 postoperative\*:ti,ab,kw
  - #47 postsurger\*:ti,ab,kw
  - #48 "pulmonary surgical procedure":ti,ab,kw
  - #49 MeSH descriptor: [Recovery Room] explode all trees
  - #50 "recovery room\*":ti,ab,kw
  - #51 "respiratory therap\*":ti,ab,kw
  - #52 "respiratory weaning":ti,ab,kw
  - #53 sternotom\*:ti,ab,kw
  - #54 surger\*:ti,ab,kw
  - #55 MeSH descriptor: [Anesthesia Department, Hospital] explode all trees
  - #56 MeSH descriptor: [Specialties, Surgical] this term only
  - #57 MeSH descriptor: [Surgical Procedures, Operative] explode all trees
  - #58 "surgical decompression":ti,ab,kw
  - #59 surgical:ti,ab,kw
  - #60 "thoracic surgical procedure\*":ti,ab,kw
  - #61 thoracotom\*:ti,ab,kw
  - #62 "vascular surgical procedure\*":ti,ab,kw
  - #63 ventilat\*:ti,ab,kw
  - #64 "ventilator weaning":ti,ab,kw
  - #65 MeSH descriptor: [Actigraphy] explode all trees
  - #66 MeSH descriptor: [Accelerometry] explode all trees
  - #67 acceleromet\*:ti,ab,kw
  - #68 actimet\*:ti,ab,kw
  - #69 actig\*:ti,ab,kw
  - #70 actomet\*:ti,ab,kw
  - #71 "anesthetic recovery":ti,ab,kw
  - #72 craniectomies:ti,ab,kw
  - #73 anesthesia\*:ti,ab,kw
  - #74 anaesthesia\*:ti,ab,kw
  - #75 #1 or #2 or #3 or #4 or #5 or #6 or #7 or #8 or #9 or #10 or #11 or #12 or #13 or #14 or #15 or #16 or #17 or #18 or #19 or #20 or #21 or #22 or #23 or #24 or #25 or #26 or #27 or #28 or #29 or #30 or #31 or #32 or #33 or #34 or #35 or #36 or #37 or #38 or #39 or #40 or #41 or #42 or #43 or #44 or #45 or #46 or #47 or #48 or #49 or #50 or #51 or #52 or #53 or #54 or #55 or #56 or #57 or #58 or #59 or #60 or #61 or #62 or #63 or #64 or #65 or #66 or #67 or #68 or #69 or #70 or #71 or #72 or #73 or #74
- 

**Proquest**

(all("acute care" OR "acute condition" OR "acute conditions" OR "acute disease" OR "acute diseases" OR "acute diseased" OR "acute disorder" OR "acute disorders" OR anesthes\* OR anaesthes\* OR "anesthetic recovery" OR "artificial respiration" OR "artificial respirations" OR "artificial ventilation" OR "artificial ventilations" OR "assisted circulation" OR burn\* OR "cardiac surgical procedure" OR "cardiac surgical procedures" OR "cardiopulmonary bypass" OR "cardiovascular surgical procedure" OR "cardiovascular surgical procedures" OR "controlled respiration" OR "controlled ventilation" OR "coronary care unit" OR "coronary care units" OR craniectomy OR craniectomies OR "critical care" OR "critical illness" OR "critically ill" OR ecmo OR esophagectom\* OR "extracorporeal circulation" OR "extracorporeal membrane oxygenation" OR "heart-assist device" OR "heart-assist devices" OR hepatectom\* OR ICU\* OR "intensive care" OR "mechanical ventilation" OR "mechanical ventilations" OR "neurosurgical procedure" OR "neurosurgical procedures" OR "organ transplant" OR "organ transplantation" OR "organ transplantations" OR "organ transplants" OR pancreatectom\* OR pancreaticoduodenectom\* OR pancreaticojejunostom\* OR postoperative\* OR postsurger\* OR "pulmonary surgical procedure" OR "pulmonary surgical procedures" OR "recovery room" OR "recovery rooms" OR "respiratory therapy" OR "respiratory therapies" OR "respiratory therapeutic" OR "respiratory therapeutics" OR "respiratory weaning" OR sternotom\* OR surgical OR surger\* OR "surgical decompression" OR "thoracic surgical procedure" OR "thoracic surgical procedures" OR thoracotom\* OR "vascular surgical procedure" OR "vascular surgical procedures" OR ventilat\* OR "ventilator weaning") OR SU("Critical care" OR "intensive care" OR "ventilation" OR "surgery" OR "anesthesia" OR "burns" OR "postoperative period")) AND all(accelerometer OR accelerometry OR actimet\* OR actigraph\* OR actomet\*)

---

80

**Table E1. Risk of Bias Assessment for Observational Studies (Newcastle Ottawa Scale)**

| Observational studies    | Representativeness of exposed cohort <sup>†</sup> | Selection of non-exposed cohort <sup>†</sup> | Ascertainment of exposure(s) <sup>†</sup> | Demonstration that sleep disorders/problems were not present at start <sup>‡</sup> | Comparability of cohorts <sup>‡</sup> | Assessment of outcome <sup>§</sup> | Was follow-up long enough for outcome to occur? <sup>¶</sup> | Adequacy of follow-up <sup>¶¶</sup> |
|--------------------------|---------------------------------------------------|----------------------------------------------|-------------------------------------------|------------------------------------------------------------------------------------|---------------------------------------|------------------------------------|--------------------------------------------------------------|-------------------------------------|
| Beecroft et al (E1)      | ●                                                 |                                              |                                           |                                                                                    |                                       | ○                                  | ●                                                            | ○                                   |
| Van Der Kooij et al (E2) | ●                                                 |                                              |                                           | ○                                                                                  |                                       | ○                                  | ●                                                            | ○                                   |
| Mistraletti et al (E3)   | ●                                                 |                                              |                                           |                                                                                    |                                       | ●                                  | ○                                                            | ○                                   |
| Kroon et al (E4)         | ●                                                 |                                              |                                           |                                                                                    |                                       | ●                                  | ●                                                            | ○                                   |
| Shilo et al (E5)         | ●                                                 | ○                                            | ○                                         | ●                                                                                  | ●                                     | ●                                  | ○                                                            | ○                                   |
| Shilo et al (E6)         | ●                                                 |                                              |                                           | ●                                                                                  |                                       | ●                                  | ○                                                            | ○                                   |
| Redeker et al (E7)       | ●                                                 |                                              |                                           |                                                                                    |                                       | ●                                  | ○                                                            | ○                                   |
| Raymond et al (E8)       | ●                                                 |                                              |                                           |                                                                                    |                                       | ●                                  | ○                                                            | ○                                   |
| Takaesu et al (E9)       | ○                                                 | ○                                            | ○                                         | ●                                                                                  | ●                                     | ●                                  | ●                                                            | ○                                   |
| Hamze et al (E10)        | ●                                                 |                                              |                                           | ●                                                                                  |                                       | ●                                  | ●                                                            | ○                                   |

● = high risk of bias, ● = unclear risk of bias, ○ = low risk of bias  
<sup>‡</sup> high risk if not consecutively screened, chosen based on specific criteria.  
<sup>†</sup> only applicable for studies with a pre-defined exposure.  
<sup>‡</sup> only for cohort studies.  
<sup>§</sup> low risk if compared to polysomnography (PSG) or other scale.  
<sup>¶</sup> high risk if individual study period <24 h, low risk if >24h.  
<sup>¶¶</sup> low risk if <10% lost to follow up.

**Table E2. Risk of Bias Assessment for Randomized Controlled Trials (Cochrane Method)**

| RCT studies        | Random sequence generation (selection bias) | Allocation concealment (selection bias) | Blinding of participants and personnel (performance bias) | Incomplete outcome data addressed (attrition bias) | Selective reporting | Other potential threats | Comments on other threats  |
|--------------------|---------------------------------------------|-----------------------------------------|-----------------------------------------------------------|----------------------------------------------------|---------------------|-------------------------|----------------------------|
| Chen et al (E11)   | ○                                           | ○                                       | ●                                                         | ○                                                  | ○                   | ◐                       |                            |
| Bourne et al (E12) | ○                                           | ◐                                       | ○                                                         | ●                                                  | ○                   | ○                       |                            |
| Ono et al (E13)    | ○                                           | ○                                       | ●                                                         | ◐                                                  | ○                   | ●                       | All participants are males |

● = high risk of bias, ◐ = unclear risk of bias, ○ = low risk of bias

## **REFERENCES**

- E1. Beecroft JM, Ward M, Younes M, Crombach S, Smith O, Hanly PJ. Sleep monitoring in the intensive care unit: comparison of nurse assessment, actigraphy and polysomnography. *Intensive Care Med.* 2008;34:2076–2083.
- E2. van der Kooi AW, Tulen JH, van Eijk MM, de Weerd AW, van Uiter MJ, van Munster BC, Slooter AJ. Sleep monitoring by actigraphy in short-stay ICU patients. *Crit Care Nurs Q.* 2013;36:169–173.
- E3. Mistraletti G, Taverna M, Sabbatini G, Carloni E, Bolgiagli L, Pirrone M, Cigada M, Destrebecq AL, Carli F, Iapichino G. Actigraphic monitoring in critically ill patients: preliminary results toward an “observation-guided sedation.” *J Crit Care.* 2009;24:563–567.
- E4. Kroon K, West S. “Appears to have slept well”: assessing sleep in an acute care setting. *Contemp Nurse.* 2000;9:284–294.
- E5. Shilo L, Dagan Y, Smorjik Y, Weinberg U, Dolev S, Komptel B, Balaum H, Shenkman L. Patients in the intensive care unit suffer from severe lack of sleep associated with loss of normal melatonin secretion pattern. *Am J Med Sci.* 1999;317:278–281.
- E6. Shilo L, Dagan Y, Smorjik Y, Weinberg U, Dolev S, Komptel B, Shenkman L. Effect of melatonin on sleep quality of COPD intensive care patients: a pilot study. *Chronobiol Int.* 2000;17:71–76.
- E7. Redeker NS, Mason DJ, Wykpsz E, Glica B. Sleep patterns in women after coronary artery bypass surgery. *Appl Nurs Res.* 1996;9:115–122.
- E8. Raymond I, Ancoli-Israel S, Choinière M. Sleep disturbances, pain and analgesia in adults hospitalized for burn injuries. *Sleep Med.* 2004;5:551-559.
- E9. Takaesu Y, Futenma K, Kobayashi M, Komada Y, Tanaka N, Yamashina A, Inoue Y. A preliminary study on the relationships between diurnal melatonin secretion profile and sleep variables in patients emergently admitted to the coronary care unit. *Chronobiol Int.* 2015;32:875–879.
- E10. Hamze FL, de Souza CC, Chianca TC. The influence of care interventions on the continuity of sleep of intensive care unit patients. *Rev Lat Am Enfermagem.* 2015;23:786–796.
- E11. Chen JH, Chao YH, Lu SF, Shiung TF, Chao YF. The effectiveness of valerian acupressure on the sleep of ICU patients: a randomized clinical trial. *Int J Nurs Stud.* 2012;49:913–920.
- E12. Bourne RS, Mills GH, Minelli C. Melatonin therapy to improve nocturnal sleep in critically ill patients: encouraging results from a small randomised controlled trial. *Crit Care.* 2008;12:R52.
- E13. Ono H, Taquchi T, Kido Y, Fujino Y, Doki Y. The usefulness of bright light therapy for patients after oesophagectomy. *Intensive Crit care Nurs.* 2011;27:158–166.
